# Supplementary material
Source: PubMed Central journal article supplement (PMC5544393)
Supplement: mmc1.pdf [file mmc1.pdf]

**The American Journal of Human Genetics, Volume 101**

**Supplemental Data**

**Leveraging Multi-ethnic Evidence  
for Risk Assessment of Quantitative Traits  
in Minority Populations**

**Marc A. Coram, Huaying Fang, Sophie I. Candille, Themistocles L. Assimes, and Hua Tang**

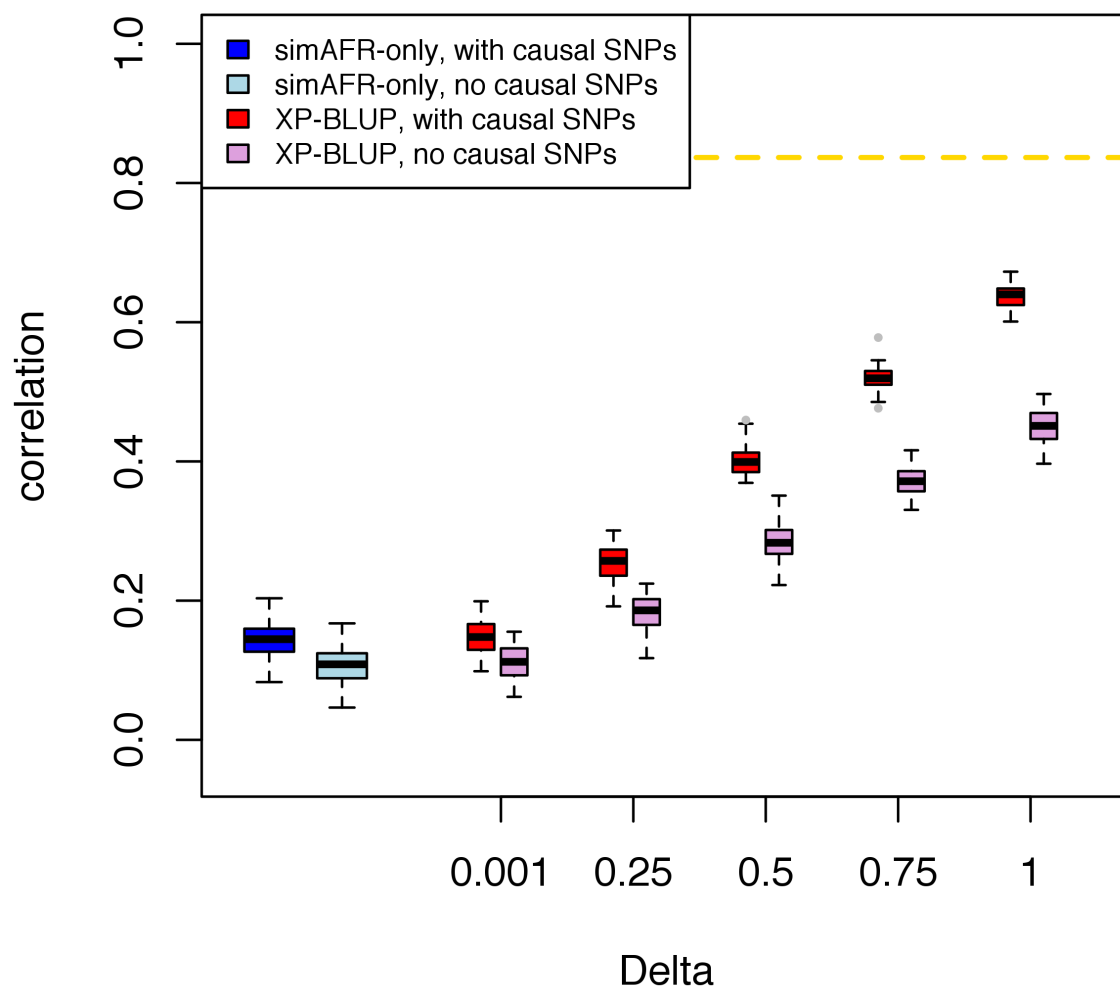

Figure S1. Comparison of predictive correlation, with or without the causal variants, by XP-BLUP to a single-component linear mixed-effects model (LMM) using the simAFR training data only. Delta specifies the proportion of overlapping loci between ethnicities. Dashed line is the theoretical maximum.

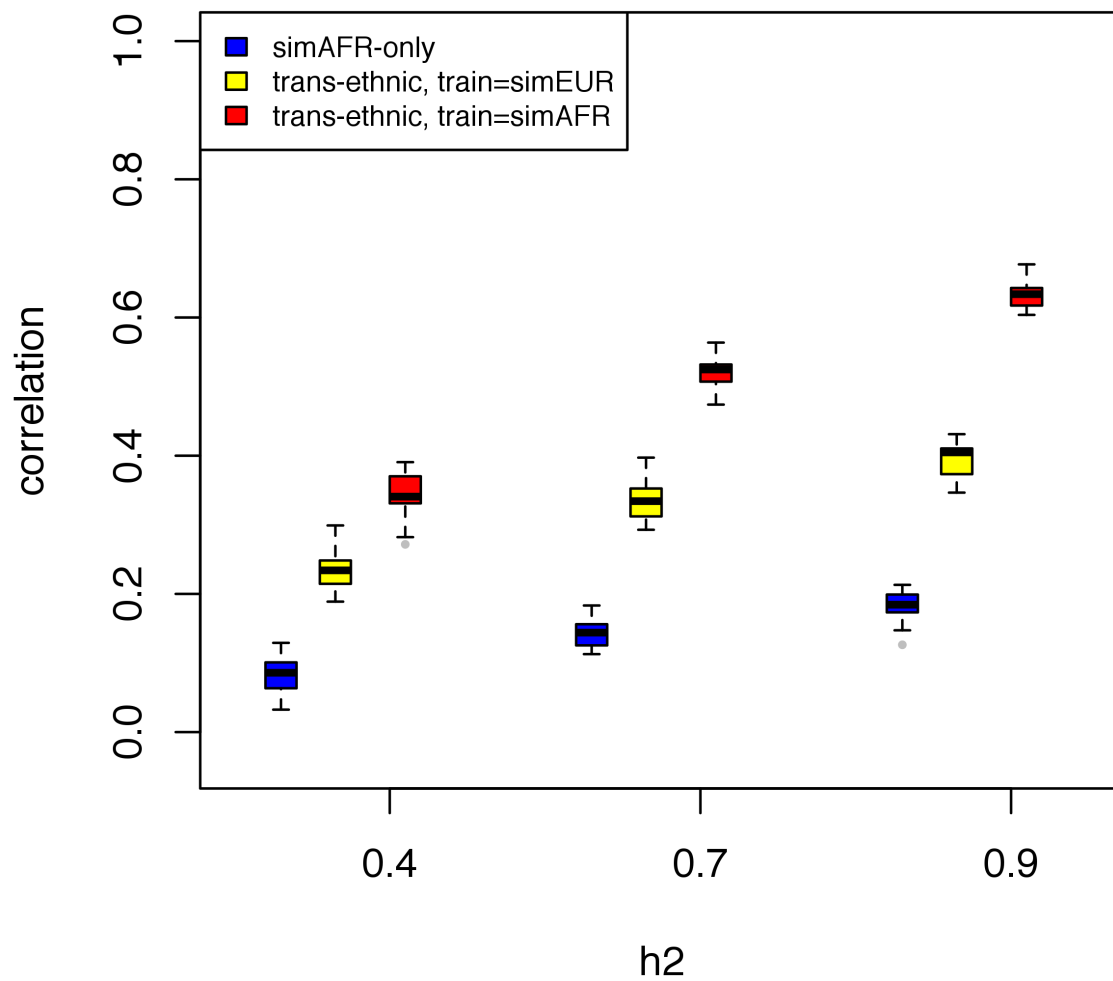

Figure S2. Predictive correlation of XP-BLUP and a single-component linear mixed-effects model (LMM) using the simAFR training data only, as a function of the underlying heritability ( $h^2$ ).

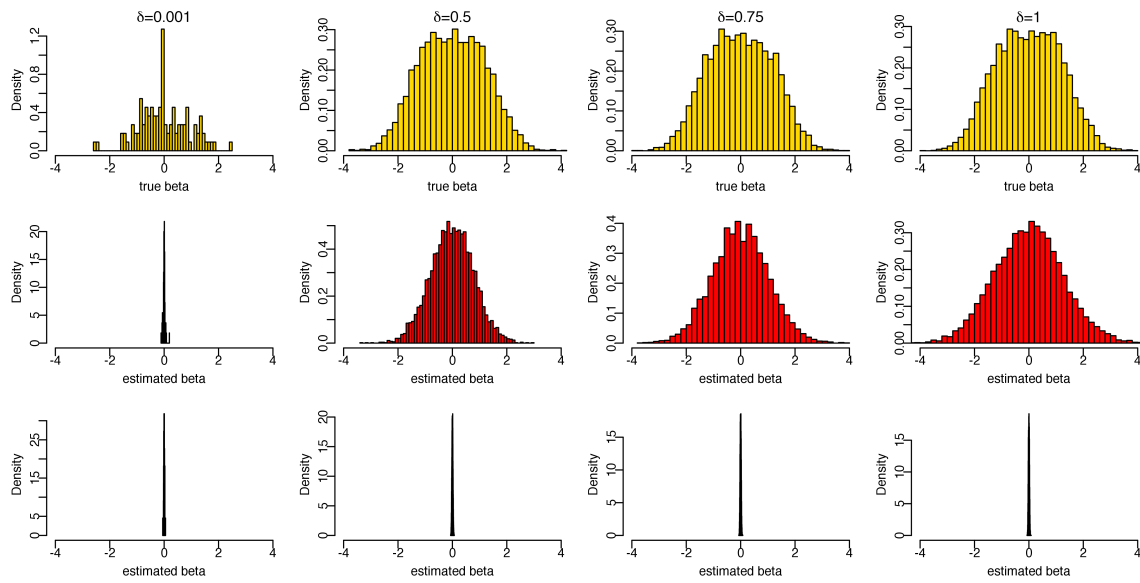

Figure S3. True and BLUP of trait-relevant SNP effects in simulations with varying degree of overlap between ethnicities. **Top row:** True effects of SNPs in  $C_I$ . **Middle row:** BLUP for SNPs in  $C_I$ ; **bottom row:** BLUP for SNPs not  $C_I$ . Column heading  $\delta$  indicates the degree of loci overlap between ethnicities:  $\delta = 0.001$  represents independent genetic architecture, while  $\delta = 1$  indicates all trait loci are shared.

| <b>p-threshold</b> | <b> <math>C_I</math> </b> | <b><math>VG_1</math> (SE)</b> | <b>Prediction r</b> |
|--------------------|---------------------------|-------------------------------|---------------------|
| $5 \times 10^{-8}$ | 413                       | 479.61<br>(113.09)            | 0.18                |
| $5 \times 10^{-7}$ | 518                       | 471.74<br>(113.08)            | 0.19                |
| $5 \times 10^{-6}$ | 698                       | 451.84<br>(112.87)            | 0.19                |
| $5 \times 10^{-5}$ | 1068                      | 477.98<br>(113.89)            | 0.19                |
| $5 \times 10^{-4}$ | 1932                      | 430.99<br>(112.72)            | 0.18                |
| $5 \times 10^{-3}$ | 6371                      | 422.29<br>(117.29)            | 0.15                |
| 1                  | 864472                    | 609.335<br>(119.01)           | 0.095               |

**Table S1: Predictive correlation coefficient for Low-density lipoprotein (LDL) level in WHI-SHARe at varying threshold** ( $VG_1$ : variance explained by SNPs in  $C_I$ ; Prediction r is evaluated on testing set).

| <b>p-threshold</b> | <b> <math>C_I</math> </b> | <b><math>VG_1</math> (SE)</b>                      | <b>Prediction r</b> |
|--------------------|---------------------------|----------------------------------------------------|---------------------|
| $5 \times 10^{-8}$ | 569                       | $1.18 \times 10^{-2}$<br>( $3.58 \times 10^{-3}$ ) | 0.22                |
| $5 \times 10^{-7}$ | 706                       | $1.14 \times 10^{-2}$<br>( $3.56 \times 10^{-3}$ ) | 0.23                |
| $5 \times 10^{-6}$ | 910                       | $1.15 \times 10^{-2}$<br>( $3.57 \times 10^{-3}$ ) | 0.22                |
| $5 \times 10^{-5}$ | 1257                      | $1.11 \times 10^{-2}$<br>( $3.59 \times 10^{-3}$ ) | 0.21                |
| $5 \times 10^{-4}$ | 2174                      | $1.07 \times 10^{-2}$<br>( $3.63 \times 10^{-3}$ ) | 0.19                |
| $5 \times 10^{-3}$ | 6351                      | $8.64 \times 10^{-3}$<br>( $3.72 \times 10^{-3}$ ) | 0.16                |
| 1                  | 864472                    | $1.69 \times 10^{-2}$<br>( $3.81 \times 10^{-3}$ ) | 0.086               |

**Table S2: Predictive correlation coefficient for log high-density lipoprotein (HDL) in WHI-SHARe at varying threshold ( $VG_1$ : random effects variance explained by SNPs in  $C_I$ ; Prediction r is evaluated on testing set).**

| <b>p-threshold</b> | <b> C<sub>I</sub> </b> | <b>VG<sub>1</sub></b>                              | <b>Prediction r</b> |
|--------------------|------------------------|----------------------------------------------------|---------------------|
| $5 \times 10^{-8}$ | 413                    | $4.32 \times 10^{-2}$<br>( $1.28 \times 10^{-2}$ ) | 0.17                |
| $5 \times 10^{-7}$ | 531                    | $4.37 \times 10^{-2}$<br>( $1.29 \times 10^{-2}$ ) | 0.17                |
| $5 \times 10^{-6}$ | 726                    | $4.03 \times 10^{-2}$<br>( $1.28 \times 10^{-2}$ ) | 0.17                |
| $5 \times 10^{-5}$ | 1065                   | $3.81 \times 10^{-2}$<br>( $1.27 \times 10^{-2}$ ) | 0.17                |
| $5 \times 10^{-4}$ | 1996                   | $3.77 \times 10^{-2}$<br>( $1.28 \times 10^{-2}$ ) | 0.16                |
| $5 \times 10^{-3}$ | 6508                   | $2.90 \times 10^{-2}$<br>( $1.30 \times 10^{-2}$ ) | 0.15                |
| 1                  | 864472                 | $5.34 \times 10^{-2}$<br>( $1.33 \times 10^{-2}$ ) | 0.078               |

**Table S3: Predictive correlation coefficient for log triglyceride (TG) level in WHI-SHARe at varying threshold (VG<sub>1</sub>: variance explained by SNPs in C<sub>I</sub>; Prediction r is evaluated on testing set).**
